# Supplementary material for: Etiology, Severity, Audiogram Type, and Device Usage in Patients with Unilateral Moderate to Profound Sensorineural Hearing Loss in Japan
Source: MDPI journal article supplement (doi:10.3390/jcm12134290), 2023-06-26
Supplement: s1 [file s1]

**Table S1. Items of questionnaire (for the institutions with otolaryngology residency program)**

1. Name of the institutions
2. Name of the provider, address of the provider
3. Criteria of the patients
  - (1) The patients who were referred to your institutions between April 2018 to March 2020 for the first time.
  - (2) The patients with moderate, severe, or profound sensorineural hearing loss ( $\geq 40$ dB HL) in one ear and normal hearing ( $< 20$ dB HL or appropriate for age) in the other ear. Patients with conductive hearing loss should be excluded.
4. Information about the patients
  - (1) ID for the study
  - (2) Age
  - (3) Gender
  - (4) Etiology (Chose only one choice)
    - ① Acquired
 

|                                      |                          |
|--------------------------------------|--------------------------|
| 1. Sudden Sensorineural Hearing Loss | 6. Other trauma          |
| 2. Auditory tumor                    | 7. Mumps                 |
| 3. Meniere's disease                 | 8. Meningitis            |
| 4. Perilymphatic fistula             | 9. Other detected causes |
| 5. Acoustic trauma                   | 10. Unknown              |
    - ② Congenital
 

|                                  |                          |
|----------------------------------|--------------------------|
| 1. Anomaly                       | 4. Other infection       |
| 2. Cochlear Nerve Canal Stenosis | 5. Other detected causes |
| 3. Cytomegalovirus infection     | 6. Unknown               |
  - (5) Severity (Chose only one choice)
    - ① Moderate: pure-tone average at 3 frequencies (0.5Hz, 1kHz, and 2kHz)  $\geq 40$ dB and  $< 70$  dB
    - ② Severe: pure-tone average at 3 frequencies (0.5Hz, 1kHz, and 2kHz)  $\geq 70$ dB and  $< 90$  dB
    - ③ Profound: pure-tone average at 3 frequencies (0.5Hz, 1kHz, and 2kHz)  $\geq 90$  dB
  - (6) Intervention
    - ① No
    - ② Yes
 

|                              |                                  |
|------------------------------|----------------------------------|
| 1. Bone Anchored Hearing Aid |                                  |
| 2. Hearing Aid               |                                  |
| (1) Air conductive           | (3) Cartilage conductive         |
| (2) Bone conductive          | (4) Contralateral routing system |
| 3. Cochlear Implant          |                                  |



## Items of questionnaire (for the institutions with Japan Auditory Society board members)

1. Name of the institutions
2. Name of the provider, address of the provider
3. Criteria of the patients
  - (3) The patients who were referred to your institutions between April 2017 to March 2020 for the first time.
  - (4) The patients with moderate, severe or profound sensorineural hearing loss ( $\geq 40$ dB HL) in one ear and normal hearing ( $< 20$ dB HL or appropriate for age) in the other ear. Patients with conductive hearing loss should be excluded.
4. Information about the patients
  - (1) ID for the study
  - (2) Age
  - (3) Gender
  - (4) Etiology (Chose only one choice)
    - ① Acquired
      1. Sudden Sensorineural Hearing Loss
      2. Auditory tumor
      3. Meniere's disease
      4. Perilymphatic fistula
      5. Acoustic trauma
      6. Other trauma
      7. Mumps
      8. Meningitis
      9. Other detected causes
      10. Unknown
    - ② Congenital
      1. Anomaly
      2. Cochlear Nerve Canal Stenosis
      3. Cytomegalovirus infection
      4. Other infection
      5. Other detected causes
      6. Unknown
  - (5) Pure tone audiogram data
  - (6) Intervention
    - ① No
    - ② Yes
      1. Bone Anchored Hearing Aid
      2. Hearing Aid
        - (1) Air conductive
        - (2) Bone conductive
      3. Cochlear Implant
      - (3) Cartilage conductive
      - (4) Contralateral routing system
